# Supplementary material
Source: publisher figshare collection journal article supplement (https://acs.figshare.com/ndownloader/files/6979619)
Supplement: Supplementary file 1 [file 6979619]

## Supporting Information

# Structure and Dynamic Behavior of Na-Diglyme Complex in the Graphite Anode of Sodium Ion Battery by $^2\text{H}$ NMR

*Kazuma Gotoh,<sup>\*,†‡</sup> Hisashi Maruyama,<sup>†</sup> Tatsuya Miyatou,<sup>§</sup> Motohiro Mizuno,<sup>§</sup> Koki Urita,<sup>//</sup> and Hiroyuki Ishida<sup>†</sup>*

<sup>†</sup>Graduate School of Natural Science and Technology, Okayama University, 3-1-1 Tsushima-naka, Okayama 700-8530, Japan

<sup>‡</sup>Elements Strategy Initiative for Catalysts and Batteries (ESICB), Kyoto University, Nishikyo-ku, Kyoto 615-8245, Japan

<sup>§</sup>Graduate School of Natural Science and Technology, Kanazawa University, Kakuma-machi, Ishikawa 920-1192, Japan

<sup>//</sup>Graduate School of Engineering, Nagasaki University, 1-14 Bunkyo-machi, Nagasaki 852-8521, Japan

1) TEM images of pristine graphite and Na-diglyme-GIC

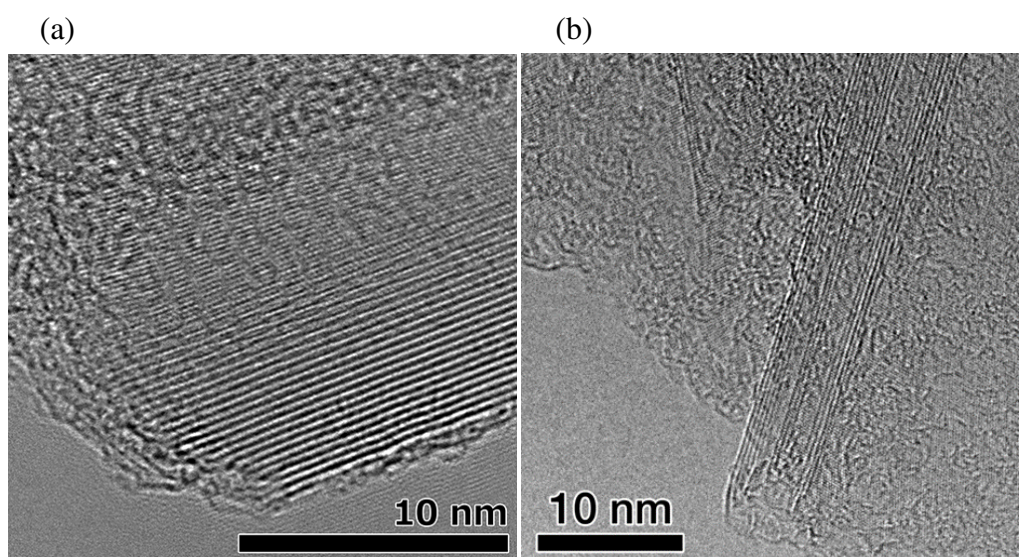

**Figure S1.** TEM images of pristine graphite (a) and Na-diglyme-GIC (b).

2) XRD patterns of Na-diglyme-GIC and Na-diglyme(d14)-GIC

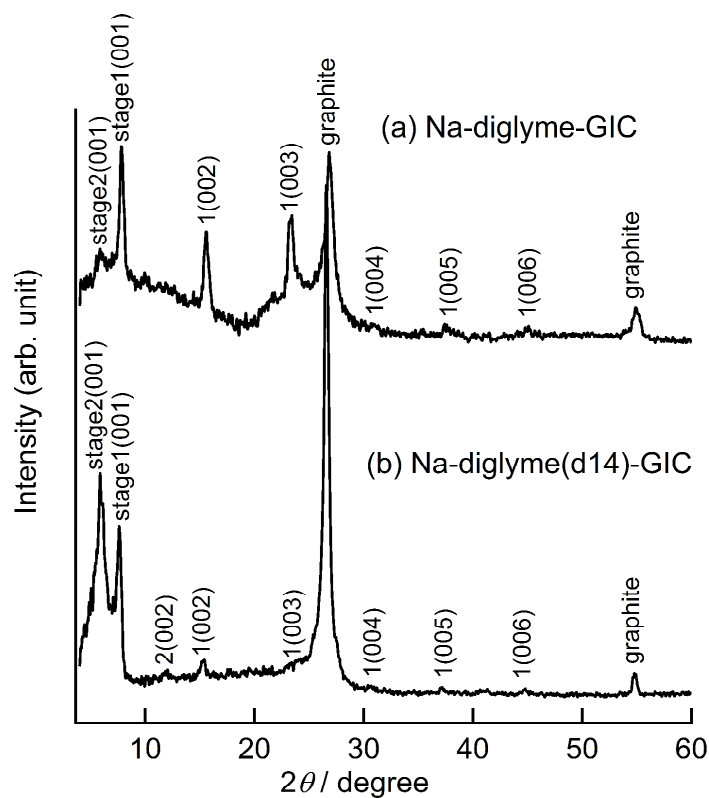

**Figure S2.** Powder XRD patterns of Na-diglyme-GIC (a) and Na-diglyme(d14)-GIC (b) synthesized using a solution-phase reaction. Both samples show peaks ascribed to stage 1 and stage 2 phases. The broad peaks around 5 and 27° in (a) are background reflections due to the sample holder window.

### 3) Composition of Na-diglyme-GIC

CHN elemental and ICP analyses were used to determine the composition of Na-diglyme-GIC. To obtain Na content by ICP, the GIC was rinsed by diglyme to remove Na on the surface of GIC sample and then combusted in air at 800 °C. The resulting ash ( $\text{Na}_2\text{CO}_3$ ) was dissolved in ultrapure water. The mass not assigned to C, H, or Na was ascribed to oxygen.

**Table S1.** Results of elemental analysis and estimated composition of Na-diglyme-GIC

| C          | H         | Na       | O     | composition                                                 |
|------------|-----------|----------|-------|-------------------------------------------------------------|
| 71.09±3.15 | 4.12±0.29 | 3.94±0.2 | 20.86 | $\text{C}_{22-26}(\text{diglyme})_{1.8-2.2}\text{Na}_{1.0}$ |

4)  $^{23}\text{Na}$  MAS NMR spectra of Na-diglyme-GIC

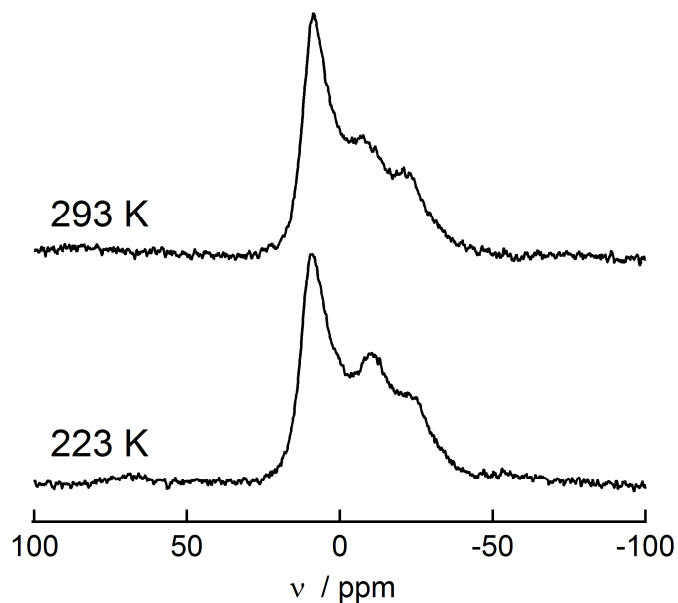

**Figure S3.**  $^{23}\text{Na}$  MAS NMR spectrum of Na-diglyme-GIC taken at 293 and 223 K. Main peaks at 9 ppm and the edge structures at -25 ppm are ascribed to a predominant second-order quadrupolar component (quadrupolar coupling constant;  $q_{\text{cc}} = 2$  MHz) of sodium ion, whereas subordinate peaks at -9 ppm are assigned to sodium ion in diglyme liquid on the product surface or Na-diglyme located in defects in the GIC.

5) Schematic for the tilt of C–D bonds in CD<sub>2</sub> groups

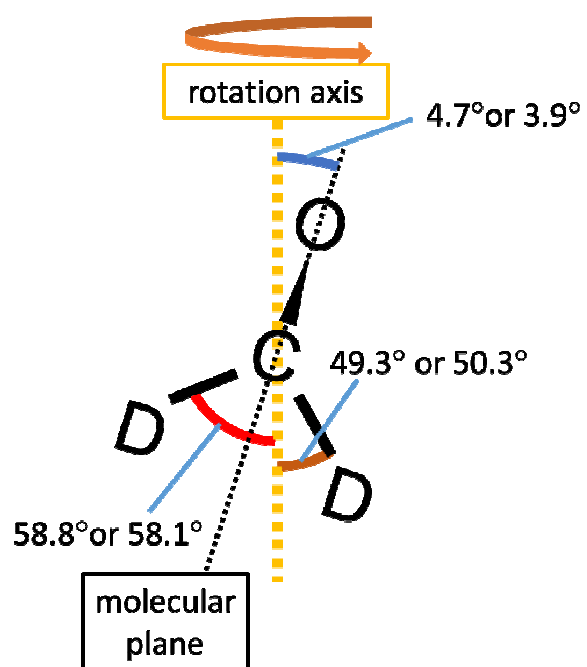

**Figure S4.** Schematic for the tilt of C–D bonds in CD<sub>2</sub> groups.
